# Supplementary material
Source: MDPI journal article supplement (https://www.mdpi.com/1424-2818/13/11/536)
Supplement: s1 [file s1]

Archive with 9 entries (9 files):
- File S1.pdf
- File S2.pdf
- File S3.pdf
- File S4.pdf
- File S5.pdf
- File S6.pdf
- File S7.pdf
- File S8.pdf
- File S9.pdf
