# Supplementary material
Source: MDPI journal article supplement (https://www.mdpi.com/1424-2818/13/11/536)

**File S6 . Maximum likelihood (RAxML) phylograms for each individual gene dataset: (a) COI, (b) 16S, (c) 18S, and (d) H3.**

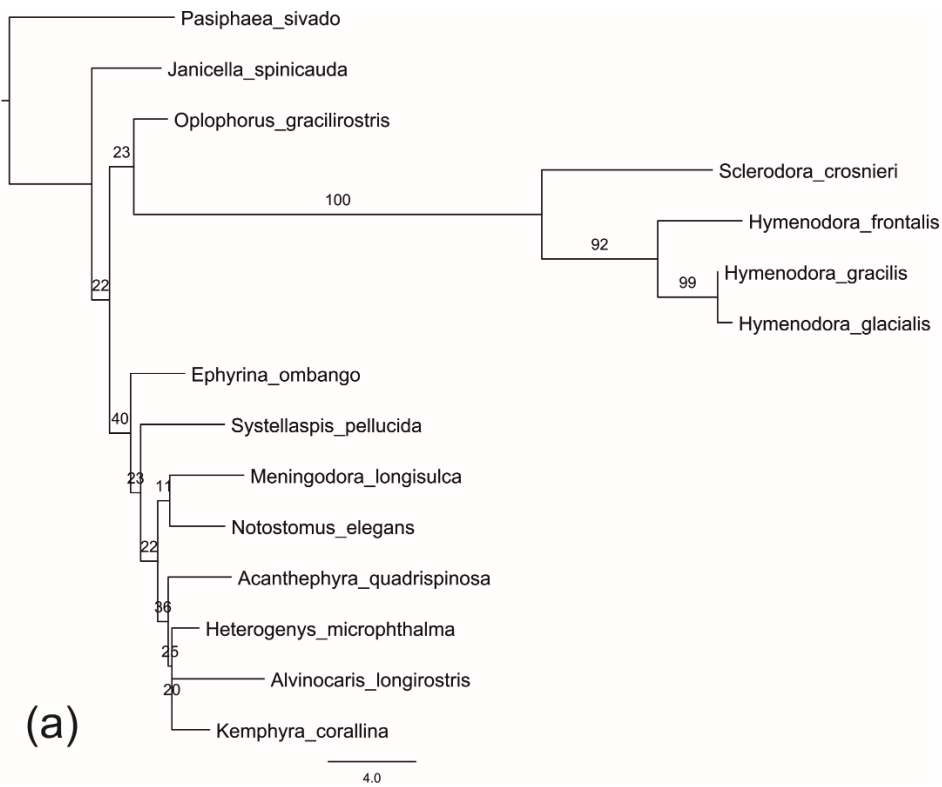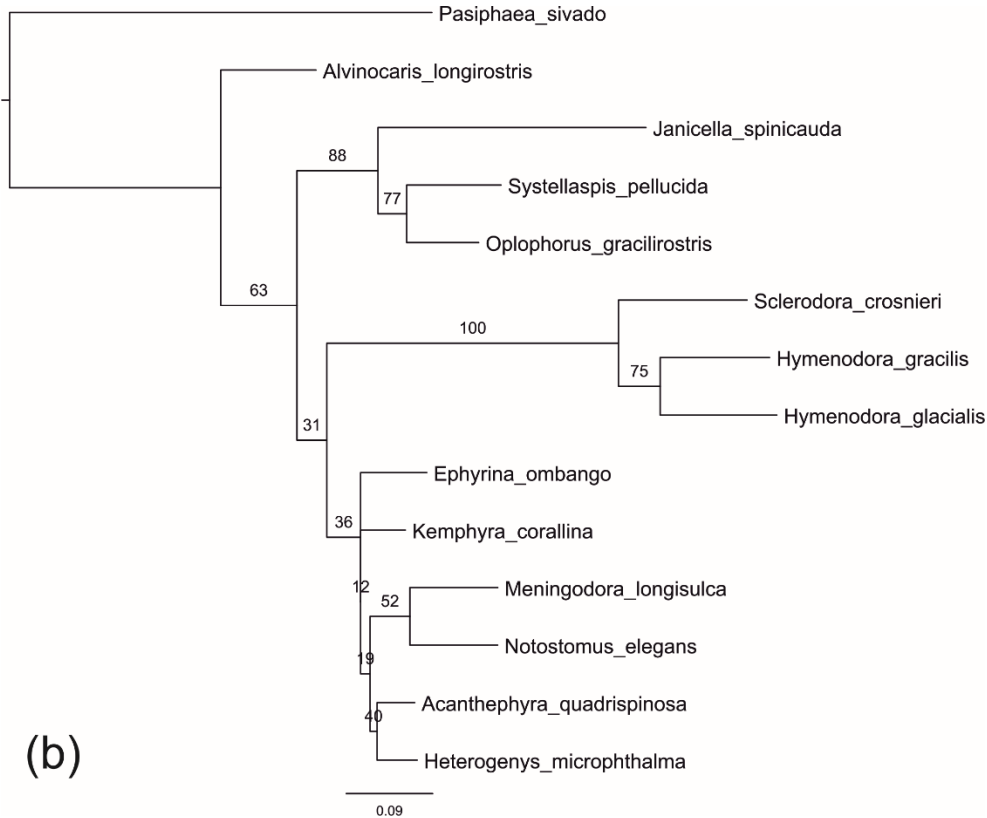

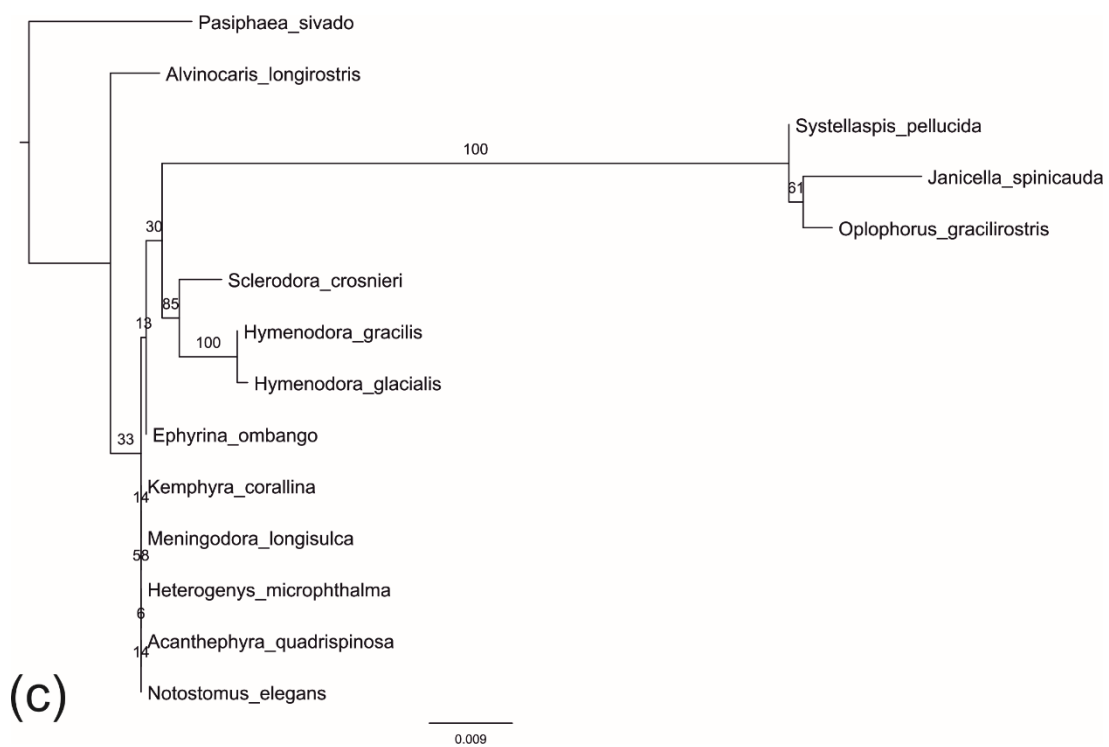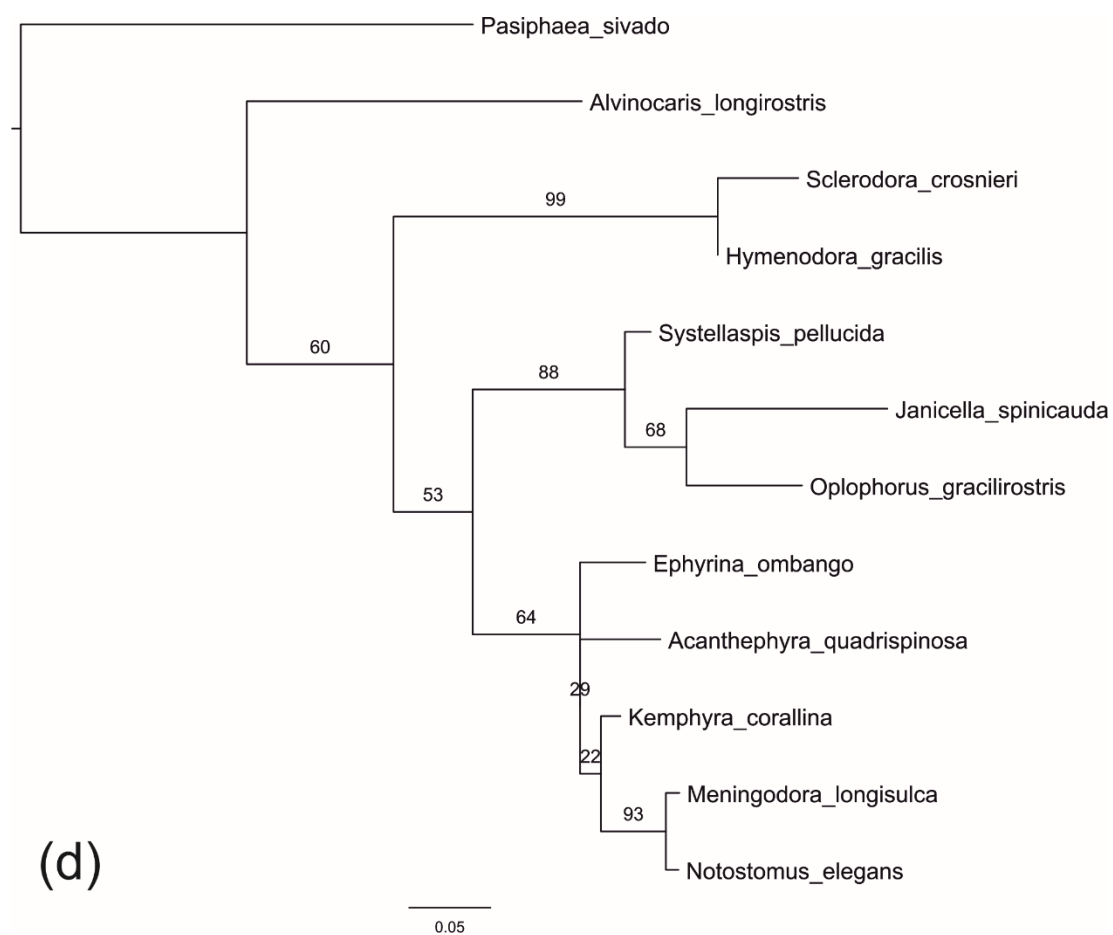

Supplement: s1 [file s1 › File S6.pdf]

File S8. Molecular BI (above) and ML (below) trees.

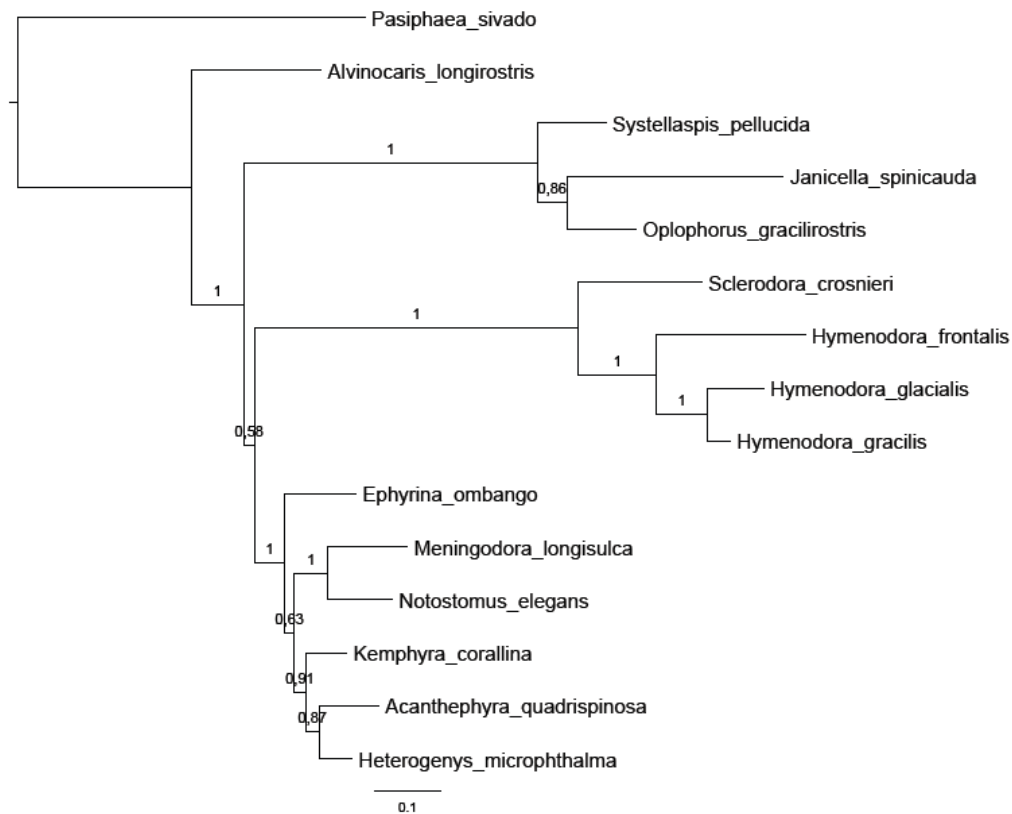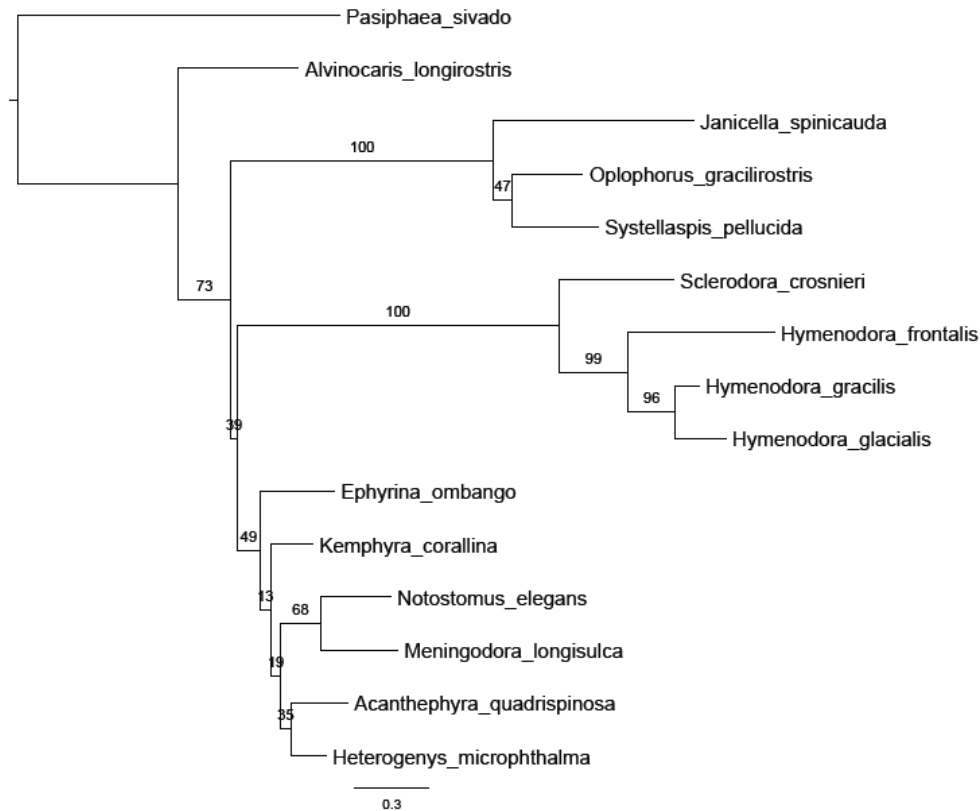

Supplement: s1 [file s1 › File S8.pdf]
